# Supplementary material for: Adenovirus-mediated delivery of Sema3A alleviates rheumatoid arthritis in a serum-transfer induced mouse model
Source: PubMed Central journal article supplement (PMC5630410; doi:10.18632/oncotarget.19915), 2017-08-03
Supplement: oncotarget-08-66270-s001.pdf [file oncotarget-08-66270-s001.pdf]

## Adenovirus-mediated delivery of Sema3A alleviates rheumatoid arthritis in a serum-transfer induced mouse model

### SUPPLEMENTARY MATERIALS

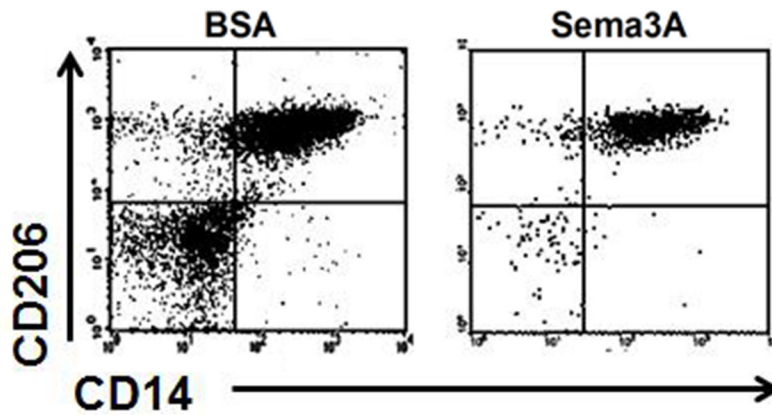

Supplementary Figure 1: The percentage of CD206 positive cells determined by FACS.

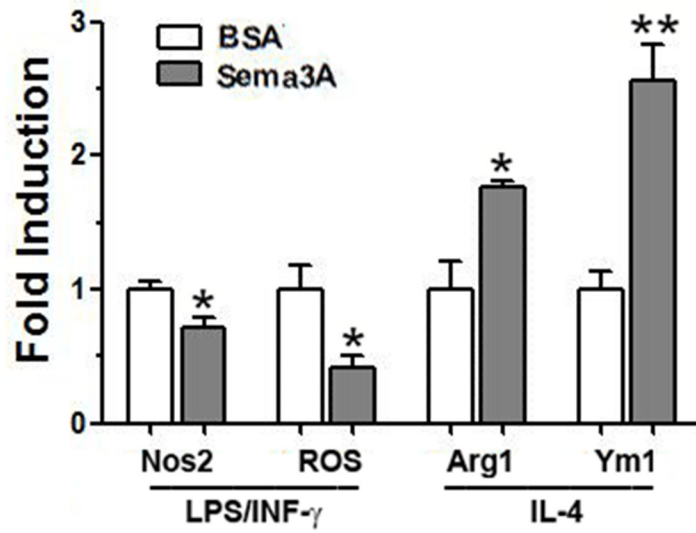

Supplementary Figure 2: The M1 markers were significantly reduced, while M2 markers were increased after Sema3A treatment in RAW264.7 cells. \* P<0.05, \*\* P<0.01.

Supplementary Table 1: Primer sequences for PCR analysis

| Gene               |         | Primer sequence                      |
|--------------------|---------|--------------------------------------|
| Nos2               | forward | 5'-TCCCAGCACAAAGGGCTCAA-3'           |
|                    | reverse | 5'-TGCGGACCATCTCCTGCATT-3'           |
| Arg1               | forward | 5'-CAGAAGAATGGAAGAGTCAG-3'           |
|                    | reverse | 5'-CAGATATGCAGGGAGTCACC-3'           |
| Ym1                | forward | 5'-GGGCATACCTTTATCCTGAG-3'           |
|                    | reverse | 5'-CCACTGAAGTCATCCATGTC-3'           |
| Fizz1              | forward | 5'-GGTCCCAGTGCATATGGATGAGACCATAGA-3' |
|                    | reverse | 5'-CACCTCTTCACTCGAGGGACAGTTGGCAGC-3' |
| CD206              | forward | 5'-CCTGGAGAGCCAAGCCATGA-3'           |
|                    | reverse | 5'-CCTTTCCGGCAGCCTTTGTC-3'           |
| Nfatc1             | forward | 5'-CCCGTCACATTCTGGTCCAT-3'           |
|                    | reverse | 5'-CAAGTAACCGTGTAGCTGCACAA-3'        |
| Integrin $\beta$ 3 | forward | 5'-GATGACATCGAGCAGCTGAAAGAG-3'       |
|                    | reverse | 5'-CCGGTCATGAATGGTGATGAGTAG-3'       |
| Src                | forward | 5'-CCATCCAGGCTGAGGAGTGG-3'           |
|                    | reverse | 5'-AGGAAGGTCCCTCTCGGGTT-3'           |
| CathepsinK         | forward | 5'-ATGTGGGTGTTCAAGTTTCTGC-3'         |
|                    | reverse | 5'-CCACAAGATTCTGGGACTC-3'            |
| Gapdh              | forward | 5'-AGGTCCGGTGTGAACGGATTTG-3'         |
|                    | reverse | 5'-TGTAGACCATGTAGTTGAGGTCA-3'        |
